# Supplementary material for: Hydrothermally stable macro-meso-microporous materials: synthesis and application in heavy oil cracking
Source: Royal Society of Chemistry journal article supplement (doi:10.1039/c4ra03752a), 2014-06-18
Supplement: c4ra03752a1.pdf [file c4ra03752a1.pdf]

## Hydrothermally stable macro-meso-microporous materials:

### Synthesis and application in heavy oil cracking

Hongtao Liu<sup>a</sup>, Kun Wang<sup>a</sup>, Yonggang Shi<sup>a</sup>, Xionghou Gao<sup>b</sup>, Honghai Liu<sup>b</sup>, Baojie Wang<sup>b</sup>,

Chunyan Xu<sup>a\*</sup>

<sup>a</sup>State Key Laboratory of Chemical Resource Engineering, Beijing University of Chemical  
Technology, Beijing 100029, P. R. China

<sup>b</sup>Petrochemical Research Institute, Petrochina Company Limited, Beijing 100195, P. R.  
China

## Supplementary materials

## 2. Experimental

### 2.1 Materials

Triblock copolymer P123 (EO<sub>20</sub>PO<sub>70</sub>EO<sub>20</sub>, Mw=5800) was purchased from Sigma-Aldrich Co. LLC. Water glass (containing 28.3 % SiO<sub>2</sub> and 8.8 % Na<sub>2</sub>O), sodium hydroxide (NaOH), sulfuric acid (H<sub>2</sub>SO<sub>4</sub>) and aluminium sulfate (Al(SO<sub>4</sub>)<sub>3</sub>·18H<sub>2</sub>O) were obtained from Tianjin Guangfu company. Sodium Dodecyl Sulfate (SDS) was purchased from Beijing Beihua Fine Chemicals Co. (China). Styrene and Sodium Persulfate Na<sub>2</sub>S<sub>2</sub>O<sub>8</sub> were obtained from Guangdong Xilong Chemical Co. (China).

### 2.2 Synthesis procedure

\*Corresponding author. Tel.: +86-1064434903; Fax.: +86-1064448327. Email: xucy@mail.buct.edu.cn.

### **2.2.1 Preparation of zeolite Y precursors:**

Y precursors was prepared according to literature <sup>9</sup>.

### **2.2.2 Preparation of PS microspheres:**

PS microspheres were obtained according to literature <sup>19</sup>.

### **2.2.3 Synthesis of hierarchical materials**

PS microspheres obtained in step 2.2.2 and P123 were dissolved in deionized water to obtain the dual templates. Zeolite Y precursor solution obtained in step 2.2.1 is added to the dual templates, and pH of the resulting gels are adjusted to 2.0 by dropwise adding 5.0 mol/L H<sub>2</sub>SO<sub>4</sub> solution. The resulting gel mixture was stirred at 40 °C for 20 h and then transferred into an autoclave to crystallize at 110 °C for 24 h. Crystallization products are collected by filtration, drying and calcination for obtaining the MSA sample. MSA was hydrothermally treated at 100 % vapor, 800 °C for 2 h, and denoted as A-MSA.

### **2.2.4 Catalytic cracking performance tests**

USY zeolite was obtained from Lanzhou Petrochemical Company. Cat-1 was prepared from Kaolin (65%), Alumina gel (10%), and USY (25%), Cat-2 was prepared from Kaolin (60%), Alumina gel (10%), MSA (5%) and USY (25%). DO-75 was the commercial catalyst obtained from Lanzhou Petrochemical Company. The three catalysts were crushed, sieved to 20-40 mesh, and steamed at 800 °C, 100% water vapor for 2 h before using.

Heavy oil catalytic cracking tests were carried out in a micro-activity testing (MAT) unit by the pulse method according to the literature <sup>11</sup>.

### 2.3 Characterizations

Powder X-ray diffraction (XRD) was carried out with a Miniflex X-ray automatic diffractometer (Rigaku, Japan) using Cu K $\alpha$  ( $\lambda = 0.154056$  nm) radiation at room temperature and operated at 30 kV and 50 mA. The powder diffractograms of the samples were recorded over a range of  $2\theta$  values from  $0.5^\circ$  to  $8^\circ$ . The scanning rate was set at  $1.00^\circ/\text{min}$ . The values of unit cell parameter were calculated using the formula  $a = 2d_{100}/3^{1/2}$ , where  $d_{100}$  represents the d-spacing value of the (100) diffraction peak in the XRD patterns. Scanning electron microscopy (SEM) and transmission electron microscopy (TEM) were carried out with a Hitachi S-4700 electron microscope (Hitachi, Japan) at 200 kV and a Rigaku H-800 electron microscope (JEOL, Japan) at 20 kV, respectively. The specimens for TEM observation were prepared by epoxy-resin-embedded microsectioning and mounting on a copper grid. N<sub>2</sub> adsorption and desorption isotherms were measured on an ASAP 2405 N instrument (Micromeritics, Germany) at liquid nitrogen temperature. The Brunauer-Emmett-Teller (BET) method was used to calculate the surface areas of the samples ( $S_{\text{BET}}$ ). The surface areas ( $S_{\text{Mic}}$ ) and volumes ( $V_{\text{Mic}}$ ) of micropores were calculated by using the V-t plot method. The sizes of mesopores were derived from Barrett-Joyner-Halenda (BJH) models. The Fourier transform infrared (FT-IR)

absorption spectra in the zeolite framework vibration region were obtained with IR Prestige-21 spectrometer (Shimadzu, Japan). Powder samples were dispersed in KBr pellets for FT-IR analysis. The spectrum was acquired in a wavenumber range between 400 and 1500  $\text{cm}^{-1}$  at 2  $\text{cm}^{-1}$  resolution.  $^{27}\text{Al}$  solid-state NMR experiments were performed on a Varian Unity Inova 300 spectrometer (Varian, USA) equipped with a double resonance 6 mm Chemagnetics<sup>TM</sup> MAS probe and operated with frequency at 78.17 MHz, pulse width at 1.6  $\mu\text{s}$ , radiofrequency field strength at 50 G, pulse delay at 1 s, spinning rate at 5 kHz.

## Supplementary Figures

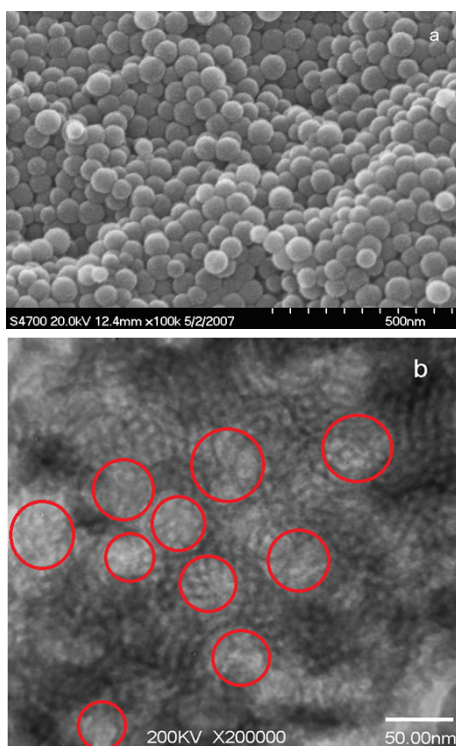

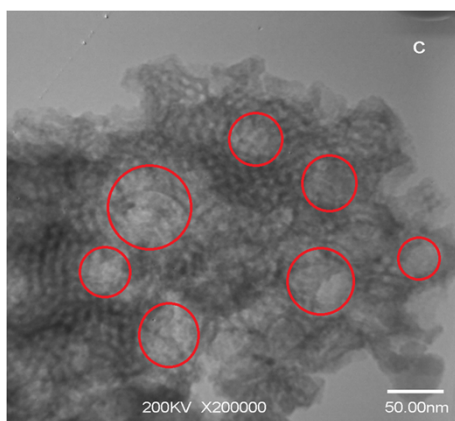

**Fig. S1** (a) SEM image of PS microspheres; (b)TEM of MSA; and (c) TEM of A-MSA. The macropores were marked by the red lines.

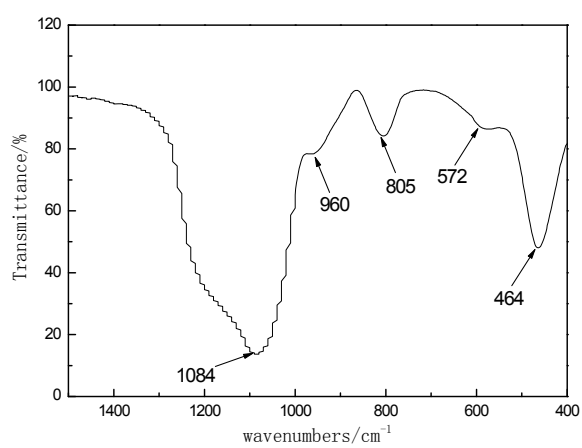

**Fig. S2** FT-IR spectra of MSA

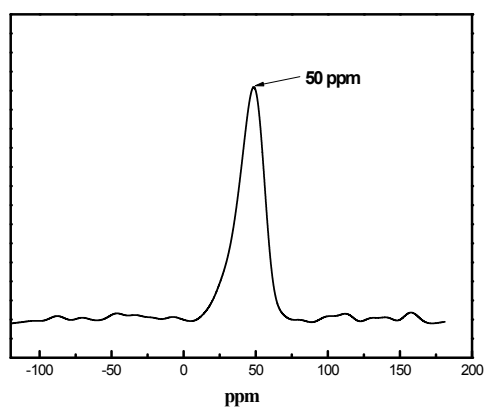

**Fig. S3** Solid-state <sup>27</sup>Al-NMR spectrum of MSA.
